# Supplementary material for: Blood-Based Lipidomics Approach to Evaluate Biomarkers Associated With Response to Olanzapine, Risperidone, and Quetiapine Treatment in Schizophrenia Patients
Source: Front Psychiatry. 2018 May 25;9:209. doi: 10.3389/fpsyt.2018.00209 (PMC5982405; doi:10.3389/fpsyt.2018.00209)
Supplement: Supplementary file 2 [file Table_2.XLSX]

## Sheet: Plan1
Olanzapine
Compound, False Discovery Rate	Compound ID	Description	Mass error (ppm)
784.6457n, ≤5%	123068803	SM(d18:2/22:0)	-0.14527
	123068782	SM(d16:1/24:1)	-0.14527
	123068783	SM(d18:1/22:1)	-0.14527
676.5505n, ≤ 5%	49703632	SM(d18:0/14:0)	-2.05966
813.5505n, ≤ 5%	123063078	PS(18:3(9Z,12Z,15Z)/20:0)	-1.80471
	123063050	PS(18:3(6Z,9Z,12Z)/20:0)	-1.80471
	123063265	PS(20:3(8Z,11Z,14Z)/18:0)	-1.80471
	123063428	PS(22:2(13Z,16Z)/16:1(9Z))	-1.80471
	123063235	PS(20:2(11Z,14Z)/18:1(9Z))	-1.80471
	123063022	PS(18:2(9Z,12Z)/20:1(11Z))	-1.80471
	123062889	PS(16:1(9Z)/22:2(13Z,16Z))	-1.80471
	123062999	PS(18:1(9Z)/20:2(11Z,14Z))	-1.80471
	123063206	PS(20:1(11Z)/18:2(9Z,12Z))	-1.80471
	123063184	PS(20:0/18:3(9Z,12Z,15Z))	-1.80471
	123063550	PS(18:0/20:3(8Z,11Z,14Z))	-1.80471
	123063183	PS(20:0/18:3(6Z,9Z,12Z))	-1.80471
1406.1404m/z, ≤ 5%	160780200	PE-Cer(d14:1(4E)/23:0)	-1.46554
	160780207	PE-Cer(d15:1(4E)/22:0)	-1.46554
	160780213	PE-Cer(d16:1(4E)/21:0)	-1.46554
	123068753	SM(d16:1/18:0)	-1.46554
	123068754	SM(d17:1/17:0)	-1.46554
	7850646	SM(d18:1/16:0)	-1.46554
770.5717m/z, ≤ 5%	123061944	PE(18:3(6Z,9Z,12Z)/20:0)	2.9189
	123062159	PE(20:3(8Z,11Z,14Z)/18:0)	2.9189
	123061972	PE(18:3(9Z,12Z,15Z)/20:0)	2.9189
	123062324	PE(22:2(13Z,16Z)/16:1(9Z))	2.9189
	123062129	PE(20:2(11Z,14Z)/18:1(9Z))	2.9189
770.5717m/z, ≤ 5%	123061916	PE(18:2(9Z,12Z)/20:1(11Z))	2.9189
	123061783	PE(16:1(9Z)/22:2(13Z,16Z))	2.9189
	123061893	PE(18:1(9Z)/20:2(11Z,14Z))	2.9189
	123062100	PE(20:1(11Z)/18:2(9Z,12Z))	2.9189
	123062448	PE(18:0/20:3(8Z,11Z,14Z))	2.9189
	123062078	PE(20:0/18:3(9Z,12Z,15Z))	2.9189
	123062077	PE(20:0/18:3(6Z,9Z,12Z))	2.9189
184.0735m/z, ≤ 5%	7982836	2-amino-heptanoic acid	0.169526
	7982834	2R-aminoheptanoic acid	0.169526
	7982835	2S-aminoheptanoic acid	0.169526
741.5251m/z, ≤ 5%	LMFA07070039	3-hydroxydodecanoylcarnitine	2.18646
	LMFA07070032	2-Hydroxylauroylcarnitine	2.18646
627.5330m/z, ≤ 5%	74380329	N-palmitoyl glycine	3.75847
367.3352m/z, ≤ 5%	74382534	C25:4 Highly branched isoprenoid A	4.98734
894.6220m/z, ≤ 5%	123063249	PS(20:2(11Z,14Z)/22:0)	2.92282
	123063440	PS(22:2(13Z,16Z)/20:0)	2.92282
	123063191	PS(20:0/22:2(13Z,16Z))	2.92282
	123063410	PS(22:1(11Z)/20:1(11Z))	2.92282
	123063219	PS(20:1(11Z)/22:1(11Z))	2.92282
	123063382	PS(22:0/20:2(11Z,14Z))	2.92282
850.6662m/z, ≤ 5%	160779975	PC(O-18:2(9Z,12Z)/22:0)	0.245168
	123061563	PC(P-20:0/20:1(11Z))	0.245168
	123061540	PC(P-18:0/22:1(11Z))	0.245168
	123061453	PC(O-18:0/22:2(13Z,16Z))	0.245168
	123061475	PC(O-20:0/20:2(11Z,14Z))	0.245168
814.6304m/z, ≤ 5%	123060918	PC(18:2(9Z,12Z)/20:0)	-1.97078
	123062334	PE(22:2(13Z,16Z)/19:0)	-1.97078
	123061134	PC(20:2(11Z,14Z)/18:0)	-1.97078
	123060863	PC(17:2(9Z,12Z)/21:0)	-1.97078
	123062142	PE(20:2(11Z,14Z)/21:0)	-1.97078
	123061329	PC(22:2(13Z,16Z)/16:0)	-1.97078
	7983330	PC(18:1(11Z)/20:1(13Z))	-1.97078
	123060783	PC(16:1(9Z)/22:1(11Z))	-1.97078
	123060760	PC(16:0/22:2(13Z,16Z))	-1.97078
	123061062	PC(19:1(9Z)/19:1(9Z))	-1.97078
	123062066	PE(19:1(9Z)/22:1(11Z))	-1.97078
	123060895	PC(18:1(9Z)/20:1(11Z))	-1.97078
	123061299	PC(22:1(11Z)/16:1(9Z))	-1.97078
	123061105	PC(20:1(11Z)/18:1(9Z))	-1.97078
	123062304	PE(22:1(11Z)/19:1(9Z))	-1.97078
	7983278	PC(18:0/20:2(5Z,8Z))	-1.97078
	7983277	PC(18:0/20:2(5Z,14Z))	-1.97078
	7983276	PC(18:0/20:2(5Z,11Z))	-1.97078
	14713782	PC(20:0/18:2(9Z,12Z))	-1.97078
	123061250	PC(21:0/17:2(9Z,12Z))	-1.97078
	7983280	PC(18:0/20:2(8Z,14Z))	-1.97078
	7983279	PC(18:0/20:2(8Z,11Z))	-1.97078
	7983275	PC(18:0/20:2(11Z,14Z))	-1.97078
	123062254	PE(21:0/20:2(11Z,14Z))	-1.97078
	123062036	PE(19:0/22:2(13Z,16Z))	-1.97078
625.5154m/z, ≤ 5%	49703528	1-(14-methyl-pentadecanoyl)-2-(8-[3]-ladderane-octanyl)-sn-glycerol	-2.00431
822.5954m/z, ≤ 5%	123060916	PC(18:2(9Z,12Z)/19:0)	-3.69596
	123062328	PE(22:2(13Z,16Z)/18:0)	-3.69596
	123061131	PC(20:2(11Z,14Z)/17:0)	-3.69596
	123061921	PE(18:2(9Z,12Z)/22:0)	-3.69596
	123060857	PC(17:2(9Z,12Z)/20:0)	-3.69596
	123061327	PC(22:2(13Z,16Z)/15:0)	-3.69596
	123062136	PE(20:2(11Z,14Z)/20:0)	-3.69596
1156.3219m/z, ≤ 5%	85292192	Cyanidin 3-(6''-ferulyl-2'''-sinapylsophoroside)-5-glucoside	-4.07104
1566.1393m/z, ≤ 5%	123061324	PC(22:2(13Z,16Z)/13:0)	-3.55515
	123061127	PC(20:2(11Z,14Z)/15:0)	-3.55515
	123060909	PC(18:2(9Z,12Z)/17:0)	-3.55515
	123060849	PC(17:2(9Z,12Z)/18:0)	-3.55515
	123060889	PC(18:1(9Z)/17:1(9Z))	-3.55515
	123061051	PC(19:1(9Z)/16:1(9Z))	-3.55515
	123060648	PC(13:0/22:2(13Z,16Z))	-3.55515
	123061098	PC(20:1(11Z)/15:1(9Z))	-3.55515
	123060820	PC(17:1(9Z)/18:1(9Z))	-3.55515
	123060775	PC(16:1(9Z)/19:1(9Z))	-3.55515
	123060739	PC(15:1(9Z)/20:1(11Z))	-3.55515
916.5253m/z, ≤ 5%	74380485	Tylosin	-1.21556
668.4981m/z, ≤ 5%	7850641	CerP(d18:1/18:0)	-1.34408
842.5869m/z, ≤ 1%	123063085	PS(18:3(9Z,12Z,15Z)/22:0)	-4.29183
	123063377	PS(22:0/18:3(9Z,12Z,15Z))	-4.29183
781.5537m/z, ≤ 5%	123067203	PA(O-20:0/20:2(11Z,14Z))	3.94701
	123067311	PA(P-20:0/20:1(11Z))	3.94701
	123067288	PA(P-18:0/22:1(11Z))	3.94701
	123067181	PA(O-18:0/22:2(13Z,16Z))	3.94701
824.5750m/z, ≤ 5%	123063788	PS(P-18:0/20:1(11Z))	-3.25797
	123063766	PS(P-16:0/22:1(11Z))	-3.25797
	123063683	PS(O-18:0/20:2(11Z,14Z))	-3.25797
	123063664	PS(O-16:0/22:2(13Z,16Z))	-3.25797
	123063809	PS(P-20:0/18:1(9Z))	-3.25797
	123063701	PS(O-20:0/18:2(9Z,12Z))	-3.25797
780.5527m/z, ≤ 1%	123062224	PE(20:5(5Z,8Z,11Z,14Z,17Z)/19:0)	-1.42179
	123061220	PC(20:5(5Z,8Z,11Z,14Z,17Z)/16:0)	-1.42179
	160779937	PC(22:5(4Z,7Z,10Z,13Z,16Z)/14:0)	-1.42179
	160779939	PC(22:5(7Z,10Z,13Z,16Z,19Z)/14:0)	-1.42179
	123061000	PC(18:4(6Z,9Z,12Z,15Z)/18:1(9Z))	-1.42179
	160779887	PC(18:4(6Z,9Z,12Z,15Z)/18:1(11Z))	-1.42179
	123062357	PE(22:4(7Z,10Z,13Z,16Z)/17:1(9Z))	-1.42179
	160779915	PC(20:4(8Z,11Z,14Z,17Z)/16:1(9Z))	-1.42179
	123061357	PC(22:4(7Z,10Z,13Z,16Z)/14:1(9Z))	-1.42179
	123062196	PE(20:4(5Z,8Z,11Z,14Z)/19:1(9Z))	-1.42179
	123061191	PC(20:4(5Z,8Z,11Z,14Z)/16:1(9Z))	-1.42179
	123060914	PC(18:2(9Z,12Z)/18:3(9Z,12Z,15Z))	-1.42179
	123060941	PC(18:3(6Z,9Z,12Z)/18:2(9Z,12Z))	-1.42179
	123060971	PC(18:3(9Z,12Z,15Z)/18:2(9Z,12Z))	-1.42179
	123060892	PC(18:1(9Z)/18:4(6Z,9Z,12Z,15Z))	-1.42179
	160779836	PC(14:0/22:5(7Z,10Z,13Z,16Z,19Z))	-1.42179
	160779844	PC(16:1(9Z)/20:4(8Z,11Z,14Z,17Z))	-1.42179
	123060695	PC(14:1(9Z)/22:4(7Z,10Z,13Z,16Z))	-1.42179
	123060913	PC(18:2(9Z,12Z)/18:3(6Z,9Z,12Z))	-1.42179
	160779857	PC(18:1(11Z)/18:4(6Z,9Z,12Z,15Z))	-1.42179
	160779835	PC(14:0/22:5(4Z,7Z,10Z,13Z,16Z))	-1.42179
	14713790	PC(16:1(7Z)/20:4(5Z,8Z,11Z,14Z))	-1.42179
	123061835	PE(17:1(9Z)/22:4(7Z,10Z,13Z,16Z))	-1.42179
	7983182	PC(16:1(9Z)/20:4(5Z,8Z,11Z,14Z))	-1.42179
	7983120	PC(16:0/20:5(5Z,8Z,11Z,14Z,17Z))	-1.42179
	123062062	PE(19:1(9Z)/20:4(5Z,8Z,11Z,14Z))	-1.42179
	123062032	PE(19:0/20:5(5Z,8Z,11Z,14Z,17Z))	-1.42179
858.5788m/z, ≤ 5%	123061567	PC(P-20:0/20:5(5Z,8Z,11Z,14Z,17Z))	1.74736
	7983873	PC(O-18:0/22:6(4Z,7Z,10Z,13Z,16Z,19Z))	1.74736
866.5844m/z, ≤ 5%	123063027	PS(18:2(9Z,12Z)/22:0)	-4.40448
	123063242	PS(20:2(11Z,14Z)/20:0)	-4.40448
	123063432	PS(22:2(13Z,16Z)/18:0)	-4.40448
862.5620m/z, ≤ 5%	123063445	PS(22:2(13Z,16Z)/20:5(5Z,8Z,11Z,14Z,17Z))	3.16943
	123063222	PS(20:1(11Z)/22:6(4Z,7Z,10Z,13Z,16Z,19Z))	3.16943
820.5460m/z, ≤ 5%	123067363	PC(16:0/20:4(5Z,8Z,10E,14Z)(12OH[S]))	-0.313536
	123067364	PC(16:0/20:4(6E,8Z,11Z,14Z)(5OH[S]))	-0.313536
